# Supplementary material
Source: PubMed Central journal article supplement (PMC5565793)
Supplement: NIHMS890990-supplement-Supplemental_figure_and_legend.pdf [file NIHMS890990-supplement-Supplemental_figure_and_legend.pdf]

## SUPPLEMENTARY FIGURE LEGENDS

1

2

3 **Supplementary Figure 1.** Pathogen detection in children with CAP with no identified etiology

4 and asymptomatic controls by method.

A

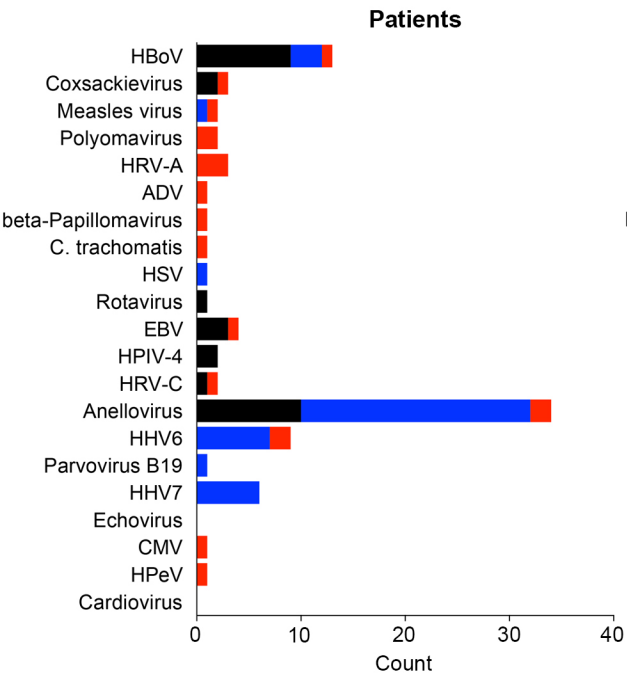

B

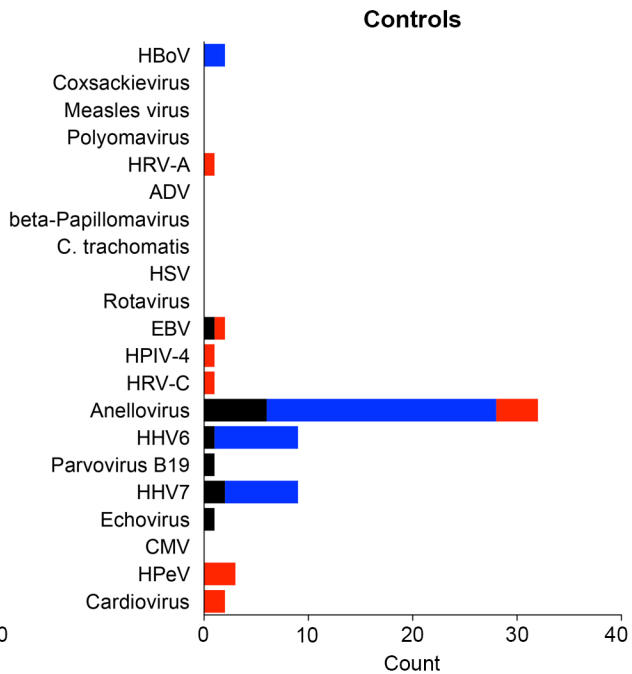

RNA-seq and PVG
  PVG only
  RNA-seq only
